# Supplementary material for: Nonselective and A2a-Selective Inhibition of Adenosine Receptors Modulates Renal Perfusion and Excretion Depending on the Duration of Streptozotocin-Induced Diabetes in Rats
Source: Pharmaceuticals (Basel). 2023 May 11;16(5):732. doi: 10.3390/ph16050732 (PMC10222446; doi:10.3390/ph16050732)
Supplement: Supplementary file 1 [file pharmaceuticals-16-00732-s001.zip › Table S1.pdf]

**Table S1. Parameters of body weight, blood and plasma (tail vein samples, upper section) and the data of 24 h observations in metabolic cages (lower section) for the samples obtained before streptozotocin or solvent injections (“Initial”) and 3-4 days before acute experiment (“Final”) in male Tac:Cmd:SD rats untreated (NG) or pre-treated with streptozotocin (DM).**

|                                                    |      | NG        |             |          | DM         |             |          |
|----------------------------------------------------|------|-----------|-------------|----------|------------|-------------|----------|
|                                                    | m.c. | Initial   | Final       | <i>N</i> | Initial    | Final       | <i>N</i> |
| Body weight<br>(g)                                 | 14   | 232 ± 7   | 299 ± 3*    | 16       | 244 ± 3    | 256 ± 5*†   | 24       |
|                                                    | 60   | 198 ± 3&  | 406 ± 7*&   | 37       | 204 ± 3&   | 289 ± 6*†&  | 43       |
| Glycaemia<br>(mg/dL)                               | 14   | 180 ± 6   | 163 ± 6*    | 16       | 193 ± 7    | 481 ± 16*†  | 24       |
|                                                    | 60   | 172 ± 4   | 158 ± 5*    | 37       | 180 ± 3    | 535 ± 8*†&  | 43       |
| Haematocrit<br>(%)                                 | 14   | 43 ± 1    | 43 ± 0      | 15       | 43 ± 0     | 46 ± 0*†    | 22       |
|                                                    | 60   | 41 ± 0&   | 46 ± 0*&    | 34       | 41 ± 0&    | 49 ± 0*†&   | 43       |
| Plasma osmolality<br>(mosmol/kg H <sub>2</sub> O)  | 14   | 297 ± 2   | 299 ± 2     | 16       | 299 ± 2    | 317 ± 2*†   | 24       |
|                                                    | 60   | 295 ± 1   | 306 ± 2*&   | 34       | 293 ± 1&   | 316 ± 2*†   | 43       |
| Plasma sodium<br>(mmol/L)                          | 14   | 134 ± 1   | 134 ± 1     | 16       | 132 ± 1    | 131 ± 1     | 23       |
|                                                    | 60   | 133 ± 1   | 135 ± 1*    | 34       | 134 ± 1    | 128 ± 1*†&  | 40       |
| Plasma potassium<br>(mmol/L)                       | 14   | 5.7 ± 0.2 | 5.1 ± 0.2*  | 16       | 5.6 ± 0.2  | 5.1 ± 0.1*  | 23       |
|                                                    | 60   | 5.6 ± 0.1 | 5.1 ± 0.2*  | 34       | 5.6 ± 0.2  | 5.4 ± 0.2†& | 41       |
| Food intake<br>(g/24 h/300 g BWt)                  | 14   | 34 ± 2    | 23 ± 1      | 10       | 27 ± 1     | 40 ± 1*†    | 13       |
|                                                    | 60   | 34 ± 2    | 17 ± 1*&    | 12       | 35 ± 2&    | 36 ± 3*†    | 12       |
| Water intake<br>(ml/24 h/300 g BWt)                | 14   | 50 ± 5    | 33 ± 4*     | 9        | 37 ± 2†    | 182 ± 8*†   | 13       |
|                                                    | 60   | 47 ± 2    | 23 ± 1*&    | 16       | 58 ± 8&    | 141 ± 11*†& | 11       |
| Urine flow<br>(ml/24 h/300 g BWt)                  | 14   | 16 ± 2    | 10 ± 1*     | 10       | 13 ± 1     | 152 ± 6*†   | 13       |
|                                                    | 60   | 17 ± 2    | 10 ± 1*     | 16       | 18 ± 1&    | 117 ± 9*†&  | 12       |
| Urine osmolality<br>(mosmol/kg H <sub>2</sub> O)   | 14   | 1956 ± 89 | 2156 ± 122  | 9        | 1978 ± 76  | 1085 ± 47*† | 14       |
|                                                    | 60   | 1871 ± 87 | 2089 ± 101* | 16       | 1824 ± 86  | 1100 ± 42*† | 12       |
| Total solute excretion<br>(mosmol/24 h/300 g BWt)  | 14   | 29 ± 4    | 22 ± 1*     | 9        | 25 ± 2     | 154 ± 6*†   | 14       |
|                                                    | 60   | 30 ± 2    | 20 ± 1*     | 16       | 31 ± 1&    | 125 ± 8*†&  | 12       |
| Urine sodium excretion<br>(mmol/24 h/300 g BWt)    | 14   | 2.5 ± 0.2 | 1.8 ± 0.1*  | 9        | 2.1 ± 0.2  | 4.1 ± 0.3*† | 14       |
|                                                    | 60   | 2.5 ± 0.1 | 1.2 ± 0.1*& | 16       | 2.7 ± 0.1& | 3.9 ± 0.3*† | 12       |
| Urine potassium excretion<br>(mmol/24 h/300 g BWt) | 14   | 8.3 ± 0.9 | 5.9 ± 0.3*  | 9        | 6.6 ± 0.6  | 8.2 ± 0.4*† | 14       |
|                                                    | 60   | 8.3 ± 0.5 | 4.2 ± 0.3*& | 16       | 8.5 ± 0.4& | 8.3 ± 0.5†  | 12       |

Streptozotocin (STZ) vehicle or STZ was injected *i.p.* NG – normoglycaemic rats (vehicle injected), DM – STZ-induced hyperglycaemic rats; m.c. - metabolic cage; Bwt - body weight.

Values are means ± SEM; *N* - number of animals; \* - significantly different from the corresponding "Initial" metabolic cage; † - significantly different from the corresponding NG; & - significantly different from the corresponding 14-days value.
